# Supplementary material for: A four-subunit DNA polymerase ζ complex containing Pol δ accessory subunits is essential for PCNA-mediated mutagenesis
Source: PubMed Central journal article supplement — Nucleic Acids Res. 2012 Oct 12;40(22):11618–26. doi: 10.1093/nar/gks948 (PMC3526297; doi:10.1093/nar/gks948), 2012-10-12
Supplement: supp_gks948_nar-02295-h-2012-File006.pdf [file supp_gks948_nar-02295-h-2012-File006.pdf]

## SUPPLEMENTARY DATA TO:

### A four-subunit DNA polymerase $\zeta$ complex containing Pol $\delta$ accessory subunits is essential for PCNA-mediated mutagenesis

Alena V. Makarova, Joseph L. Stodola, and Peter M. Burgers\*

Department of Biochemistry and Molecular Biophysics, Washington University School of Medicine,  
St. Louis, MO 63110, USA

Running Title: A four-subunit Pol  $\zeta$  complex in mutagenesis

\*corresponding author:

TEL: (314) 362-3872

FAX: (314) 362-71831

E-mail: [burgers@biochem.wustl.edu](mailto:burgers@biochem.wustl.edu)

## Materials and Methods

### Strains.

The protease deficient yeast strain FM113 (a haploid version of BJ2168; *MATa*: *leu2-3,112*, *pep4-3*, *prb1-1122*, *prc1-407*, *trp1-289*, *ura3-52*), Pol32 deficient strain PY117 (*MATa*: *his3-11, 15*, *leu2-3,112*, *nuc1 $\Delta$ ::LEU2*, *pep4-3*, *pol32 $\Delta$ ::HIS3*, *prb1-1122*, *trp1- $\Delta$* , *ura3-52*) and Rev1 deficient strain PY201 (*MATa*: *arg4-17*, *his3 $\Delta$ -1*, *leu2-3, 112*, *trp1*, *ura3-52*, *rev1::HISG*) were used for overexpression of Pol  $\zeta_4$  and Pol  $\zeta_2$  complexes. Strain PJ69-4A (*MATa*: *gal4- $\Delta$* , *gal80- $\Delta$* , *his3- $\Delta$ 200*, *leu2-3, 112*, *LYS2::GAL1-HIS3*, *GAL2-ADE2*, *met2::GAL7-lacZ*, *trp1-901*, *ura3-52*) was used for two-hybrid analysis.

### Plasmids

The plasmids used in this study are listed in Supplementary Table 1. The pBL813 plasmid encodes *REV3* and *REV7* genes optimized to yeast codon usage. *REV3opt* and *REV7opt* genes were chemically synthesized by GenScript (NJ). Mutations in *REV3* gene were obtained by site-directed mutagenesis using the Quick Change mutagenesis kit (Stratagene). Plasmids and sequences are available upon request.

**Supplementary Table 1. Plasmids**

| name      | plasmid                                       | description                                                                                  | reference |
|-----------|-----------------------------------------------|----------------------------------------------------------------------------------------------|-----------|
| pBL346    | pRS425-GAL-POL31-POL32                        | expression of Pol31 and Pol32 under GAL1-10                                                  | this work |
| pBL347    | pRS425-GAL-HIS-POL31-POL32                    | expression of 7xHIS-Pol31 and Pol32 under GAL1-10                                            | this work |
| pBL348    | pRS425-GAL-HIS-POL31-POL32 <sup>ΔPIP</sup>    | expression of 7xHIS-Pol31 and Pol32 under GAL1-10                                            | this work |
| pBL811    | pRS426-GAL-GST-REV3                           | expression of wild type GST-Rev3 under GAL1-10                                               | (28)      |
| pBL811-A1 | pRS426-GAL-GST-REV3 <sup>C1401S, C1417S</sup> | expression of cysA-GST-Rev3 under GAL1-10                                                    | this work |
| pBL811-A2 | pRS426-GAL-GST-REV3 <sup>C1401A, C1417A</sup> | expression of cysA'-GST-Rev3 under GAL1-10                                                   | this work |
| pBL811-B  | pRS426-GAL-GST-REV3 <sup>C1449S, C1473S</sup> | expression of cysB-GST-Rev3 under GAL1-10                                                    | this work |
| pBL812    | pRS424-GAL-REV7                               | expression of Rev7 under GAL1-10                                                             | this work |
| pBL813    | pRS426-GAL-GST-REV3opt-REV7opt                | expression of wild type GST-Rev3 and Rev7 under GAL1-10 using codon-optimized genes          | this work |
| pBL816    | pGBT8-BD-REV3                                 | yeast two hybrid plasmid encoding for wild type Rev3 in a frame with GAL4 DNA binding domain | this work |
| pBL816-A  | pGBT8-BD-REV3 <sup>C1401S, C1417S</sup>       | yeast two hybrid plasmid encoding for cysA-Rev3 in a frame with GAL4 DNA binding domain      | this work |
| pBL816-B  | pGBT8-BD-REV3 <sup>C1449S, C1473S</sup>       | yeast two hybrid plasmid encoding for cysB-Rev3 in a frame with GAL4 DNA binding domain      | this work |
| pBL817    | pACT2-AD-REV7                                 | yeast two hybrid plasmid encoding for Rev7 in a frame with GAL4 activation domain            | this work |
| pBL364    | pACT2-AD-POL31                                | yeast two hybrid plasmid encoding for Pol31 in a frame with GAL4 activation domain           | (16)      |
| pBL391    | pACT2-AD-POL32                                | yeast two hybrid plasmid encoding for Pol32 in a frame with GAL4 activation domain           | (16)      |

*Expression and purification of four and two subunit Pol ζ complexes*

Stoichiometric and nonstoichiometric Pol ζ<sub>4</sub> and Pol ζ<sub>2</sub> complexes were produced in strains BJ2168, PY117 or PY201 and purified as described previously with modifications (26). Galactose induction was performed at OD<sub>660</sub> ≥ 3 and cells were grown for another 10-12 h. 500 - 800 g of cells were resuspended in 3x lysis buffer (150 mM Hepes (pH 7.8), 900 mM KCl, 90 mM K<sub>2</sub>HPO<sub>4</sub>/KH<sub>2</sub>PO<sub>4</sub> (pH 7.8), 6% glycerol, 7.5 mM sucrose, 0.15% Tween 20, 0.03% Nonidet P40, 6 mM DTT, 30 μM pepstatin A, 30 μM leupeptin, 7.5 mM benzamidine) and disrupted in a blender with dry ice. All further steps were carried out at 0–4 °C. When the powder was dissolved, PMSF was added to the suspension to 0.5 mM and glycerol was adjusted to final 8%. To precipitate nucleic acids 45 ml of 10% Polymin P was added per one liter of lysate and the mixture was stirred for 20 min. After preclearing of lysate at 18,000 rpm for 25 min, 0.31 g/ml ammonium sulfate was added to the supernatant and the mixture was stirred for another 20-30 min. The pellet was collected at 18,000 for 20 min and dissolved in 750-1200 ml of buffer A1 (50 mM Hepes (pH 7.4), 300 mM KCl, 30 mM K<sub>2</sub>HPO<sub>4</sub>/KH<sub>2</sub>PO<sub>4</sub> (pH 7.4), 8% glycerol, 2.5 mM sucrose, 0.05% Tween 20, 0.01% Nonidet P-40, 2 mM DTT, 8 μM pepstatin A, 8 μM leupeptin, 2 mM benzamidine, 0.5 mM PMSF) and gently agitated with 2.5 ml of glutathione sepharose

beads (GE Healthcare) for 2 hours. The beads were packed into a disposable BioRad column and washed with 200 ml of buffer A1, followed by 200 ml of A2 (30 mM Hepes (pH 7.8), 200 mM KCl, 30 mM K<sub>2</sub>HPO<sub>4</sub>/KH<sub>2</sub>PO<sub>4</sub> (pH 7.8), 8% glycerol, 2.5 mM sucrose, 0.05% Tween 20, 0.01% Nonidet P-40, 1 mM DTT, 5 mM MgCl<sub>2</sub>, 1 mM ATP, 2 μM pepstatin A, 0.5 mM PMSF), and buffer A3 (30 mM Hepes (pH 8), 100 mM KCl, 30 mM K<sub>2</sub>HPO<sub>4</sub>/KH<sub>2</sub>PO<sub>4</sub> (pH 8), 8% glycerol, 2.5 mM sucrose, 0.05% Tween 20, 0.01% Nonidet P-40, 1 mM DTT, 2 μM pepstatin A, 0.5 mM PMSF). Proteins were eluted by 4-5 stepwise washes with 2 ml of buffer A3 containing 30 mM of reduced glutathione. Fractions were combined and digested overnight at 4 °C with PreScission protease. The proteins were diluted 2-fold with buffer B0 (30 mM Hepes (pH 7.4), 5% glycerol, 2.5 mM sucrose, 1 mM DTT, 0.01% E10-C12 detergent) and loaded onto a 1-ml heparin agarose column. After washing the column with buffer B1 (30 mM Hepes (pH 7.4), 150 mM KCl, 10 mM K<sub>2</sub>HPO<sub>4</sub>/KH<sub>2</sub>PO<sub>4</sub> (pH 7.4), 5% glycerol, 2.5 mM sucrose, 1 mM DTT, 0.01% E10-C12), the proteins were eluted by step-gradient with buffer B2 (30 mM Hepes (pH 7.4), 750 mM KCl, 20 mM K<sub>2</sub>HPO<sub>4</sub>/KH<sub>2</sub>PO<sub>4</sub> (pH 7.4), 5% glycerol, 2.5 mM sucrose, 1 mM DTT, 0.01% E10-C12). Full stoichiometric Pol ζ<sub>4</sub> was purified as described above, except that a metal-chelate affinity chromatography was performed instead of heparin column step. Fractions with PreScission protease-digested protein were diluted 2-fold with buffer E (30 mM Hepes (pH 7.4), 200 mM KCL, 20 mM K<sub>2</sub>HPO<sub>4</sub>/KH<sub>2</sub>PO<sub>4</sub> (pH 7.4) 5% glycerol, 2.5 mM sucrose, 1 mM DTT, 0.01% E10-C12, 0.5 mM PMSF) containing 10mM imidazole and incubated with 2 ml of Ni-NTA agarose beads (Qiagen) for 45 min. The beads were packed into a column, washed with 400 ml of buffer E with 20 mM imidazole and eluted with buffer E containing 200 mM imidazole. All final preparations were dialyzed against buffer D (30 mM Hepes (pH 7.4), 200 mM NaCl, 8% glycerol, 1 mM DTT).

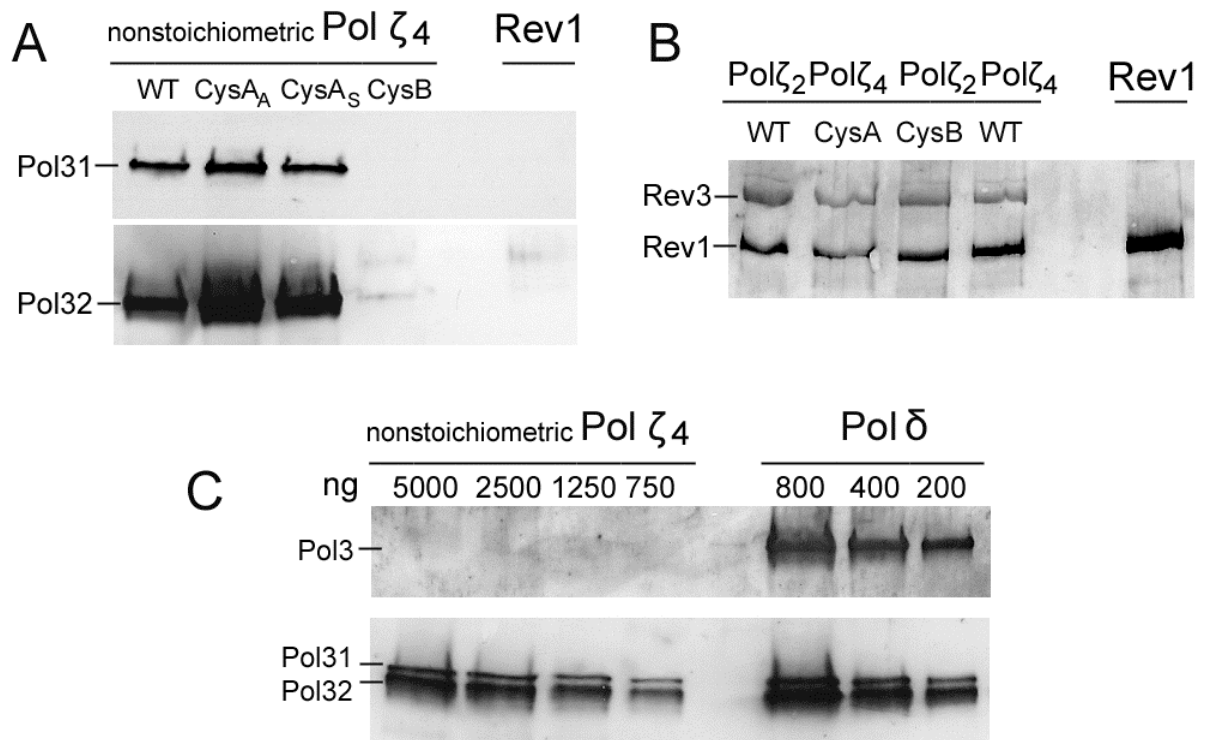

**Figure S1:** Characterization of composition of stoichiometric and nonstoichiometric Pol $\zeta_4$  and Pol $\zeta_2$  complexes preparations by Western analysis. **(A)** Detection of Pol31 and Pol32 in nonstoichiometric Pol $\zeta_4$  complexes purified from cells without Pol31-Pol32 overexpression. 5  $\mu$ g of each protein was loaded per lane. CysA<sub>A</sub>-Pol $\zeta_4$  contains a double mutation in CysA motif (CC1401,1417AA), CysA<sub>S</sub>-Pol $\zeta_4$  variant harbours a CysA mutation (CC1401,1417SS). The right lane had 5  $\mu$ g of purified Rev1, and shows the lack of Pol31 and Pol32 in the preparation. **(B)** Detection of Rev1 in purified preparations of Pol $\zeta_4$  and Pol $\zeta_2$  complexes. The Western blots contained ~600 ng of the indicated complexes, and the right lane contained 80 ng of Rev1 as control. The observed Rev3 signal is due to crossreactivity of Rev3 with the anti-Rev1 antibodies. **(C)** Detection and estimation of amount of Pol3 and Pol31-Pol32 subunits in purified preparation of nonstoichiometric Pol $\zeta_4$ . (left lanes) and in Pol  $\delta$  (right lanes).

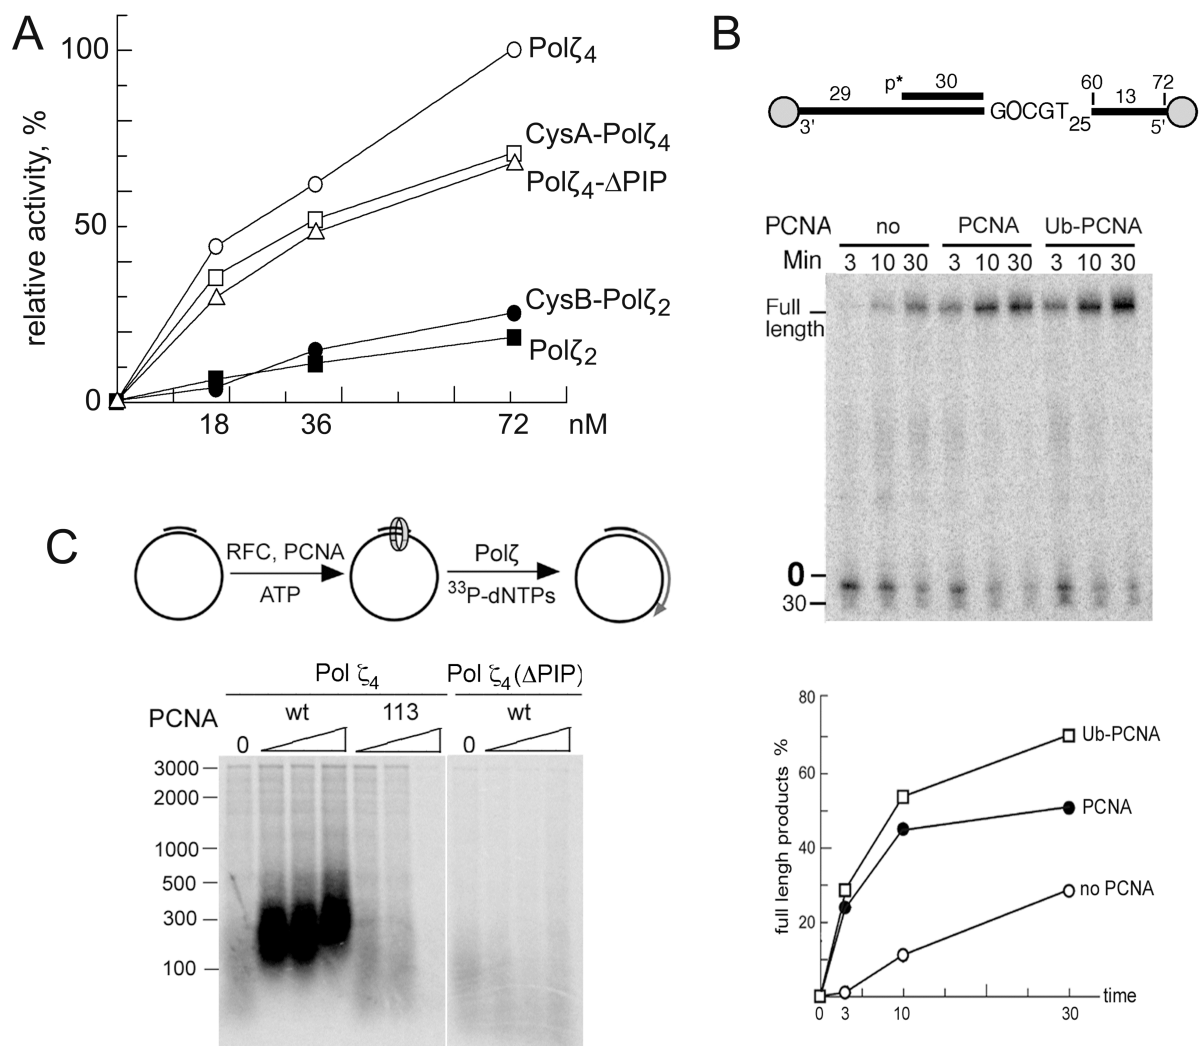

**Figure S2:** DNA polymerase activity of Pol $\zeta_4$  and Pol $\zeta_2$  complexes. **(A)** Basal DNA polymerase activity of Pol $\zeta_4$ , Pol $\zeta_2$ , CysA-Pol $\zeta_4$ , CysB-Pol $\zeta_2$  and Pol $\zeta_4$  - $\Delta$ PIP on activated calf thymus DNA. **(B)** Stimulation of translesion bypass activity of Pol $\zeta_4$  by ubiquitinated and nonubiquitinated PCNA on oligonucleotide substrate with an abasic site. For these experiments we used a split version of PCNA, that is fully functional in vivo, but allows for the facile addition of ubiquitination at position 164 (1). **(C)** Stimulation of DNA polymerase activity of Pol $\zeta_4$  - $\Delta$ PIP and Pol $\zeta_4$  by wild type PCNA and by mutant pcna-113 on primed circular bluescript SKII DNA.

### Supplementary Reference

47. Freudenthal, B.D., Gakhar, L., Ramaswamy, S. and Washington, M.T. (2010) Structure of monoubiquitinated PCNA and implications for translesion synthesis and DNA polymerase exchange. *Nat Struct Mol Biol*, 17, 479-484.
